# Supplementary material
Source: publisher figshare collection journal article supplement (https://rs.figshare.com/ndownloader/files/17868155)
Supplement: Supplementary file 1 [file 17868155]

## Sheet: Sheet1
Species	Longitude	Latitude		Species	Longitude	Latitude		Species	Longitude	Latitude		Species	Longitude	Latitude		Species	Longitude	Latitude		Species	Longitude	Latitude		Species	Longitude	Latitude		Species	Longitude	Latitude		Species	Longitude	Latitude		Species	Longitude	Latitude		Species	Longitude	Latitude
Pteropus alecto	153.565	-28.3857		Hipposideros armiger	98.9279	19.3946		Myotis davidii	118.083	31.55		Myotis brandtii	5.10108	51.5583		Rhinolophus ferrumequinum	7.35476	44.5444		Megaderma lyra	78.4011	17.3833		Rhinolophus sinicus	101.3	21.8833		Pteropus vampyrus	125.262	-9.32138		Eptesicus fuscus	-91.0045	31.8564		Eidolon helvum	1.77626	12.184		Pteronotus parnellii	-61.236	13.2013
	153.567	-28.8587			99.0737	7.53874			118.167	29.7833			12.2755	57.7714			8.61846	44.6123			79.5752	19.4793			87.2833	27.55			115.055	-8.41052			-81.4967	41.124			1.36483	10.2941			-61.2121	13.2223
	153.352	-29.4476			114.124	22.3909			119.801	31.3667			9.77704	52.0432			-3.62	50.47			78.1143	17.9531			91.7667	25.4667			125.45	-8.31667			-86.7192	33.5719			30.1903	-1.97184			-61.1646	13.2362
	153.487	-28.2041			99.435	8.251			120.033	30.1			-2.45861	52.6207			-3.62	50.38			107.88	25.48			91.7	25.3			114.517	-8.3			-87.7075	41.9743			1.79655	12.1541			-61.2089	13.2482
	153.543	-28.5299			108.68	12.18			114.202	26.6			-2.72741	54.0742			-0.66	39.11			107.42	11.43			108.3	29.4167			111	-7.5			-85.4551	32.0296			1.61685	12.1294			-61.2605	13.2484
	153.347	-29.3997			98.9197	10.1828			108.134	30.9667			-2.80626	54.1996			-4.2	51.7			96.5635	22.0675			108.167	29.3333			108.293	-7.09285			-122.782	38.6121			1.29811	10.3295			-61.2265	13.263
	129.866	-14.8347			98.842	10.0318			107.834	29.2833			5.58405	51.7279			-4.21	51			107.333	11.4			108.167	29.4167			106.794	-6.93018			-121.143	36.4958			2.75705	9.36992			-61.1478	13.2774
	153.033	-28.8644			107.88	25.48			109.651	28.2833			11.7711	60.7991			-3.4	52.8			107.33	11.4			100.2	27.05			107.921	-6.84			-94.6946	34.7789			29.3693	-2.08125			-61.2077	13.308
	153.515	-28.5903			107.174	28.282			107.184	27.9833			5.58386	51.728			-2.84	51.16			107.167	15			109.567	19.5167			111.946	-6.81912			-121.143	36.4958			1.75708	12.0883			-61.1526	13.3167
	136.983	-15.7497			103.54	11.825			106.417	28.3833			18.8958	57.8836			-4.76	50.63			104.583	18.842			108.383	30.8167			106.798	-6.60003			-72.5515	43.6372			1.77576	12.0648			-61.167	13.323
	136.98	-15.7477			105.967	23.117			100.717	22.6			18.8996	57.8866			-3.6	53.3			79.5379	9.80967			118.167	26.6333			106.78	-6.59649			-105.076	40.611			-12.1409	8.85185			-61.1492	13.3696
	136.992	-15.7693			108.93	12.1			100.083	22.7667			103.572	49.7748			-4.08	51.19			77.25	9.5833							108.333	-6.46667			-80.2285	43.5139			-16.7485	13.2175			-61.1489	13.3709
	136.983	-15.747			100.202	6.7			102.7	25.05			15.4067	60.373			-4.07	51.1			101.684	3.2374							106.8	-6.16667			-72.541	43.6342			1.6001	12.0725			-76.7167	18.0833
	136.787	-15.6005			96.5635	22.0675			100.834	26.4667			19.0047	57.8564			-5.16	50.35			83.0167	18.2833							106.17	-6.08			-106.353	37.6789			30.1688	-1.98725			-76.7237	18.0895
	136.991	-15.7689			96.614	20.599			110.684	25.4			9.90445	63.651			-2.79	51.29			99.3	15.6333							107.058	-3.5455			-81.4563	41.0777			1.78314	12.1678			-77.0833	18.15
	136.785	-15.6025			96.603	20.572			113.567	24.7667			11.059	63.6884			-3.35	50.66			82.9	17.9							99.67	-2.2			-92.2318	38.5889			1.76984	12.1972			-77.0909	18.151
	132.52	-11.0762			98.7874	25.3004			113.517	24.7333			18.8753	57.8589			-4.8	52			74.336	31.498							103.8	1.33333			-75.1796	40.9985			2.05878	13.4902			-77.0906	18.1517
	132.556	-11.3007			111.117	26.433							110.314	48.6982			-3.93	51.1			100.633	5.88333							103.857	1.36389			-72.7177	44.3601			1.31324	10.2637			-77.6258	18.2069
	132.562	-11.3005			111.1	26.35							9.78089	52.1596			-0.79	50.93			101.683	3.23333							99.2719	1.37801			-73.0912	43.9888			1.30342	10.325			-77.2703	18.2138
	136.751	-14.2106			103.85	22.4							15.0177	59.5567			-4.8	51.9			77.3	24.65							103.707	1.4155			-81.8839	41.409			1.78101	12.1694			-77.6498	18.3349
	136.23	-13.7389			103.883	22.333							18.0555	63.9714			-5.15	50.08			100.89	14.4982							110.333	1.48333			-81.4559	41.0793			1.37724	10.3078			-68.8225	18.3416
	136.756	-14.2168			120.74	23.888							10.4036	52.0108			-3.8	51.8			70.7262	34.6898							103.848	1.88144			-91.6879	37.4503			1.34153	10.3232			-68.6	18.3833
	132.564	-11.022			105.933	17.667							-3.06244	50.6598			-2.93	51.29			74.3667	31.5667							101.967	3.025			-106.425	35.8443			29.2236	-1.79289			-77.2301	18.4372
	136.219	-13.7224			103.067	18.383							-1.77747	53.092			-3.63	50.56			81.5167	6.36667							101.633	3.08333			-77.0455	38.963			29.3594	-1.68598			-77.2793	18.459
	136.75	-14.2066			105.85	17.508							-1.62815	53.0916			-4.47	50.55			77.3	24.65							101.553	3.12842			-121.561	41.6059			30.0521	-1.91253			-71.6333	18.6
	132.555	-11.3016			108.533	11.9							13.4374	55.9112			-3.76	50.47			73.0333	26.2833							101.517	3.16667			-81.5959	41.2792			1.39594	10.3703			-70.1599	18.9301
	136.854	-14.2546			107.167	15							-2.37712	53.3613			-3.2	51.8			70.9317	34.6946							115.217	3.45			-76.9424	38.914			-11.2853	7.49213			-77.2703	18.2138
	136.754	-14.214			107.217	14.967							13.3736	55.9458			-5.29	50.08			80.55	22.1							101.917	3.53333			-76.9418	38.9132			29.3822	-1.60791			-77.0906	18.1517
	132.796	-11.3931			106.1	15.05							13.4825	55.7728			-2.21	50.84			103.3	29.108							114.45	3.91667			-106.426	35.8444			29.3311	-1.71214			-77.6498	18.3349
	132.725	-11.289			103.85	22.3333							-2.45572	52.627			-4.33	50.55			88.4667	26.8833							117.483	4.41667			-78.7153	42.8845			1.26988	10.2151			-68.6	18.3833
	153.438	-28.8359			88.5	27.75							-2.52737	53.3607			-3.11	52.82			79.0333	26.7667							117.688	4.94718			-78.7152	42.8846			29.2509	-1.72212			-77.6	18.4
	132.966	-12.4217			101.25	21.855							-2.94664	52.4416			-4.4	52			75.5667	13.9167							115.617	5.21667			-72.3787	43.4981			-16.6516	13.326			-69.9333	18.5
	153.24	-29.2578			101.3	21.8833							13.3926	55.8302			-4.61	50.46			78.1333	13.1333							118.067	5.58333			-80.2978	36.8741			1.39571	10.3555			-69.6167	18.4833
	153.514	-28.195			110.23	29.25							13.5584	55.7333			-4.21	50.91			119.367	25.7167							118.117	5.83333			-95.9224	41.1853			-13.7496	9.50249			-69.5833	18.8333
	152.859	-30.6482			109.83	28.92							-2.30253	54.4895			-2.51	51.92			78.92	20.66							125.567	6.45			-81.5218	40.9392			0.793183	11.3948			-76.8	17.9667
	153.247	-29.3654			109.85	29.18							13.5597	55.7047			-5	51.7			80.2944	13.0925							122.083	6.91667			-92.4466	38.9462			30.0014	-1.86288			-69.05	18.9833
	153.577	-28.7045			120.808	21.9649							13.2447	55.8669			-3.76	50.38			77.3167	24.65							121.917	7			-77.0489	38.975			1.25604	10.7579			-70.7243	19.7333
	153.61	-28.6417			99.2833	15.4833							-0.51899	51.0307			-2.36	50.66											122.027	7.0185			-77.3628	37.234			30.0969	-1.98723			-77.1511	18.1805
	151.217	-33.8645			99.3	15.6333							18.2743	59.4957			-4.1	51.6											122.119	7.108			-80.6552	40.2333			30.114	-1.97789			-71.1833	17.9667
	153.205	-29.4627			102.194	13.1043							13.3333	55.9623			-3.1	52.9											124.25	7.2834			-100.046	25.8747			6.63018	7.97441			-70.2167	19.2564
	153.021	-29.7607			99.25	14.35							11.1509	63.1945			-3.9	51.5											125.811	7.45222			-122.503	47.421			30.123	-1.92537			-69.8611	18.9355
	153.448	-28.7441			87.2833	27.55							13.6713	55.9248			-3.49	50.83											98.8105	7.85112			-79.9136	40.4736			38.22	-6.68027			-71.1619	19.4
	153.307	-28.5799			121.117	24.0167							27.5396	59.2305			-4.8	51.8											125.8	7.8667			-104.745	39.336			4.50806	8.51832			-71.1667	19.4167
	153.434	-29.1151			121.133	24.0333							26.2743	58.8762			-4.3	51.9											124.886	8.2222			-81.608	41.5412			4.46863	7.59492			-77.5667	18.2667
	153.334	-28.4133			120.117	24.0257							26.9306	58.5211			-4.2	51.8											124.886	8.2306			-85.6052	34.4433			39.0594	-6.16214			-68.8833	18.6847
	152.381	-31.8696			102.35	2.28333							-2.83789	52.8344			-4.74	50.36											123.083	9.08333			-81.5342	40.9387			4.56928	7.41082			-69.9	19.55
	152.951	-31.1652			101.567	4.48333							16.4566	57.1791			-4.7	51.9											123.217	9.2666			-92.0815	46.8513			4.40597	7.54678			-71.2809	19.4167
	153.296	-28.8102			85.4667	27.7667							13.3928	55.902			-4.2	51.6											123.159	9.3574			-122.503	47.3901			4.49098	7.40052			-77.3833	18.1333
	151.2	-34.0259			121.77	25.15							6.03	49.5			-4.7	51.6											123.033	9.4166			-79.4625	43.6512			4.48038	7.55938			-77.0333	18.2167
	153.369	-28.3388			121.43	25.17							16.4529	57.1761			-4.1	51.5											122.967	9.4667			-79.4635	43.6514			-2.30071	7.30263			-77.017	18.3
	153.246	-29.3671			121.55	25.15							13.245	55.7847			-3.5	51.9											123.117	9.5834			-76.2379	44.781			4.57582	7.49342			-77.0167	18.0833
	150.803	-34.6291			120.8	21.95							16.4535	57.1772			-4.7	51.7											105.967	9.6			-81.4414	41.1551			0.710463	5.84406			-77.1	18.1833
	150.671	-33.734			121.47	25.17							-2.47418	52.4211			-5	51.6											123.117	9.6			-80.6564	40.2253			4.4435	7.56309			-77.6494	18.3356
	152.916	-29.6827			85.196	27.8758							13.5753	55.7847			-5.1	51.7											105.98	9.60333			-86.0383	39.4799			4.47367	7.47987			-77.6475	18.351
	152.907	-31.4364			101.683	3.23333							13.333	55.8855			12.5376	43.5375											118.733	9.7333			-81.7808	41.004			4.48001	7.56138			-77.92	18.5
	153.198	-30.1039			101.7	3.2							13.6568	55.9174			-5.03	50.45											118.767	9.7334			-104.992	39.7317			-13.126	8.21803			-77.352	18.5177
	153.202	-29.4666			121	24.6167							13.658	55.9603			35.6899	33.0469											124.333	9.75			-111.05	31.5677			-11.161	7.93818			-77.53	18.37
	132.874	-12.8233			101.633	3.29167							-1.99487	51.8907			-5.66354	40.9701											124.3	9.8			-80.9306	43.3178			25.8145	-17.8613			-77.25	17.99
	153.205	-29.4664			101.7	3.13333							13.3687	55.805			-5.66208	40.9713											118.75	9.85			-115.236	29.9704			1.24964	10.2105			-77.15	17.75
	153.209	-29.4353			100.213	6.64583							13.2875	55.8117			8.64593	44.6312											124.833	10.1333			-71.0882	42.1912			4.49475	7.59287			-77.15	18.12
	130.87	-12.4343			100.208	6.475							9.82224	51.9876			-3.14	52.79											123.133	10.4167			-121.186	36.4737			4.90327	7.42802			-76.63	17.93
	153.456	-28.2692			100.4	5.81667							-4.8	51.9			-3.2	51.6											123.173	10.5257			-82.775	35.3515			37.668	-6.85782			-70.1276	18.6839
	142.033	-9.16639			100.2	6.65							-3.2	51.8			35.6892	33.047											104.917	11.55			-81.9121	41.0996			38.2862	-6.67322			-82.9614	22.8394
	151.218	-33.8657			100.2	6.65							-2.80073	52.5892			-3.58	50.39											120.02	11.88			-79.9134	40.4732			1.24903	6.0041			-82.9242	22.8417
	151.216	-33.8651			99.85	6.33333							-1.7793	52.7324			-3.1	51.6											119.95	12.05			-123.981	40.3517			1.35158	10.71			-83.71	22.67
	151.218	-33.8645			101.783	3.9							-2.65281	53.7017			-1.22	39.08											121.933	13.2667			-87.6579	41.9252			30.335	-12.5447			-82.7	22.93
	151.218	-33.865			120.95	23.9667							7.57164	49.5856			-1.95	50.9											121.217	14.1667			-102.072	19.4244			30.3249	-12.567			-83.71	22.68
	152.916	-29.6833			85.2833	26.8833							8.85219	49.4412			0.006	40.02											120.339	14.7563			-102.788	20.8113			30.1723	-1.86196			-79.98	21.8
	151.251	-33.8151			91.7	25.3							-2.37871	53.541			-4.98	50.24											122.167	17.5			-81.7309	40.8998			30.0384	-1.9884
	152.914	-29.6933			102.167	15							9.60156	52.1532			-3.58	50.38											120.833	17.5834			-74.4386	40.4807			30.1076	-1.84599
	153.56	-28.3706			100.917	14.5167							-2.22782	53.5414			-2.18	50.87											110	-7.5			-79.486	44.0514			-11.2899	7.4895
	153.457	-28.8455			100.067	6.73333							-2.52627	53.2708			-0.27	38.93											103.836	1.3466			-76.2918	3.83639			30.1302	-1.84702
	153.28	-28.3159			83.6	28.2667							-5.29322	50.113			-3.6	50.6											101.45	3.03333			-78.1668	43.9659			-10.8658	7.63666
	145.05	-37.82			78.1	30.4667							-2.37632	53.2714			-3.77	50.48											118.54	10			-81.435	41.1528			30.1817	-1.96398
	151.274	-33.7994			95.6833	27.2833							8.33484	49.3722			-2.47	51.82											123.1	11.2167			-107.993	32.8938			30.0252	-1.94377
	151.277	-33.7906			106.717	26.5833							7.50067	49.6463			-3.49	50.4															-87.6128	39.0018			37.6988	-6.81215
	131.337	-15.6925			97.4423	25.4621							24.6768	59.4298			-2.28	51.33															-79.3439	43.7153			1.3258	10.2097
	131.329	-15.6843			103.7	29.5667							-2.23329	54.5301			-4.17	51.11															-108.51	32.9738			30.0435	-1.83552
	153.029	-29.6297			105.833	28.05							-2.66429	53.7092			-2.76	51.4															-108.53	33.0444			36.7429	-3.20006
	130.998	-12.6751			103.617	28.6167							-2.81006	54.1982			-3.13	50.7															-121.65	36.8545			34.642	-0.745751
	153.296	-28.6596			108.3	29.4167							22.7304	58.3738			-4.67	50.68															-104.667	39.8583			36.7957	-3.28205
	153.295	-28.6613			88.7	27.2167							-3.00143	54.3464			-4.91	50.28															-79.4622	43.8289			11.5859	3.79474
	130.998	-12.6664			100.667	6.51667							24.6747	59.4314			-2.28	51.71															-105.084	40.307			37.3123	-3.26043
	153.517	-28.5456			102.817	22.3833							22.7673	58.3754			-2.78	51.38															-74.9139	40.3676			-0.334746	11.063
	153.605	-28.6991			103.867	22.35							-0.11723	50.9503			-4.9	51.8															-86.2054	46.6444			-0.32786	6.23731
	152.896	-30.4477			106.833	22.4							22.7622	58.3753			-4.89	50.58															-81.7556	41.0187			11.5467	3.95187
	153.286	-28.8366			118.167	26.6333							24.6748	59.4313			-0.8	39.6															-96.9429	19.5123			0.484976	5.98754
	132.538	-12.9294			108.383	30.8167							22.0082	58.3655			-4.21	50.53															-105.059	40.4074			0.662226	5.72085
	151.692	-32.9336			98.75	24.9167							22.0438	58.2185			-3.78	50.36															-80.468	42.6425			37.2209	-3.2922
	153.609	-28.6433			98.3333	25.0833							23.2791	58.5511			-2.8	51.7															-105.075	40.5687			40.8809	-2.36946
	153.003	-28.6136			101.7	3.1667							22.0959	58.1821			-0.82	38.26															-64.9653	45.5692			-2.38752	7.32676
	153.129	-29.6367			100.198	6.66596							23.2333	58.9992			-0.006	38.66															-78.1256	44.4589			-0.526488	10.9244
	153.527	-28.4756			78.08	30.45							23.8752	59.2628			-4.91	50.58															-78.0913	44.117			39.2121	-4.61732
	153.27	-29.3667			121.525	25.0904							23.2127	58.9978			-2.55	51.72															-81.5961	41.1329			30.7892	-30.4608
	153.19	-28.3531											23.8574	59.2776			-3.67	50.61															-81.1506	41.594			10.3835	-0.467896
	152.88	-28.4383											23.7671	59.1798			-3.95	51.01															-78.1893	43.9699			29.3221	-2.09087
	136.746	-12.2061											22.7666	58.3752			7.95209	44.13															-81.4221	41.1327			-16.6589	13.3414
	153.405	-28.5588											23.2326	58.4967			128.502	37.1622															-86.0921	37.1056			-0.904603	10.4948
	153.362	-29.4795											23.2334	58.9992			-3.18	50.76															-86.4427	33.5413			34.5017	-0.06794
	132.895	-13.3432											22.7883	58.4081			16.5692	40.6828															-78.3126	43.9491			36.7322	-1.22302
	153.208	-29.3945											21.953	58.2983			-3.48	50.39															-81.884	41.409			29.2885	-1.76429
	150.941	-33.9057											23.1578	58.5645			-2.22	51.38															-72.5643	41.3156			36.6156	-1.27541
	153.363	-29.4813											-1.63046	52.822			-3.59	50.43															-86.9955	36.0524			29.342	-2.13528
	153.36	-29.4325											22.7156	58.2832			-2.65	51.83															-70.2403	43.7073			39.2262	-6.88049
	153.336	-29.5734											23.0756	58.596			-3.7	50.39															-70.2403	43.7068			4.57092	7.53102
	153.401	-28.8839											21.9341	58.2694			-4.49	50.91															-84.633	40.1028			4.40151	7.51902
	152.934	-29.7047											22.7604	58.3753			-3.34508	50.6268															-92.4465	38.9463			4.41	7.57924
	153.335	-29.5729											23.8646	59.2492			-2.36	51.38															-79.2904	35.7782			4.56288	7.50811
	153.353	-29.4493											21.9825	58.2601			-4.5	51.7															-76.6156	39.2873			4.54935	7.47772
	153.364	-29.4804											-2.37952	53.6309			-4.75	50.45															-76.6176	39.2874			4.47422	7.418
	153.364	-29.4835											22.0869	58.1942			-2.98	50.84															-90.1874	38.6299			4.44591	7.51546
	153.361	-29.4786											22.7606	58.3753			-2.36	51.2															-72.5188	43.6301			30.3769	-12.5028
	153.359	-29.4847											23.8734	59.2596			1.75	41.59															-107.938	33.386			4.50717	7.45195
	153.358	-29.4606											24.6775	59.4294			-3.7	51.6															-80.2977	36.874			4.549	7.54259
	153.345	-29.4792											22.3573	58.5337			-2.57	51.34															-86.9917	13.7678			4.41643	7.41448
	153.545	-28.2427											24.0752	58.8809			-2.86	51.33															-79.6159	43.8444			36.9525	-7.75884
	151.176	-32.5639											22.0362	58.3601			-2.34	51.36															-79.6252	43.8408			4.42064	7.45841
	151.236	-33.9001											23.2612	58.9723			-0.73	38.9															-81.6817	40.997			4.53233	7.54026
	151.217	-33.8604											23.8144	59.2866			-0.91	38.48															-81.5273	41.1493			-12.7046	14.0682
	151.262	-33.7893											23.8234	59.2881			-0.35	39.9															-108.026	33.1841			36.7203	-8.08384
	150.863	-33.7023											22.0987	58.182			-0.61	39.06															-107.489	33.012			4.42036	7.4527
	150.154	-33.4812											23.349	59.0041			-0.58	39.31															-76.4814	39.5527			39.0084	-6.69486
	151.558	-32.7293											22.6854	58.5689			6.07959	46.1795															-108.025	33.1849			34.6704	-0.638917
	152.381	-31.8705											23.2443	58.9988			-0.48	39.68															-109.361	32.0089			30.2533	-12.5367
	152.895	-31.4325											23.239	58.9966			0.06	38.82															-108.025	33.1839			4.556	7.48493
	153.1	-30.3461											-0.68578	52.6534			-0.8	39.32															-107.469	33.0121			4.46778	7.45568
	153.122	-30.2989											23.2318	58.9885			-3.61	50.41															-72.1806	41.8944			4.54836	7.51043
	153.187	-30.1658											23.14	58.552			-2.7	51.8															-109.143	33.8483			4.40846	7.53452
	153.197	-30.1017											22.7888	58.4077			-2.38	51.24															-105.109	40.1371			32.2099	2.68192
	152.943	-29.7054											23.217	58.9966			16.1081	41.9238															-72.5182	43.6302			4.53659	7.53356
	153.021	-29.6372											-2.07659	53.3618			-2.83	51.41															-105.243	40.0703			4.46233	7.55241
	153.22	-29.4975											24.6778	59.4291			-2.63	51.44															-83.519	35.3742			4.51428	7.44891
	153.343	-29.4383											-2.67905	53.4498			-3.7	50.68															-72.1145	44.2359			4.45831	7.46264
	153.417	-29.1224											-0.88904	52.7994			-2.42	51.89															-81.5438	41.3674			4.54989	7.53297
	153.391	-29.0833											23.1992	58.5108			8.69441	44.732															-101.64	19.4064			4.44826	7.4511
	153.463	-28.9531											23.2541	58.9789			8.79886	44.757															-122.782	38.6121			4.54246	7.57939
	153.482	-28.8921											24.1092	58.9047			-5	52															-108.585	33.3993			4.57623	7.58827
	153.483	-28.8861											22.6074	58.6001			-5.16	50.26															-77.3551	38.6477			4.45599	7.47763
	153.56	-28.8686											23.2788	58.5517																			-104.831	39.7294			4.43944	7.46
	153.56	-28.8685											24.6768	59.4298																			-104.821	38.8339			4.49296	7.49647
	153.439	-28.8414											22.0501	58.4544																			-104.872	39.0917			4.4805	7.57384
	153.415	-28.8261											-2.37632	53.2714																			-107.894	33.4389			4.46319	7.41889
	153.277	-28.8065											-2.37554	53.1815																			-107.586	33.094			4.45806	7.5136
	153.343	-28.7805											-2.37712	53.3613																			-101.721	19.588			4.56651	7.44321
	153.444	-28.77											23.3646	58.9762																			-73.0634	44.2501			4.47574	7.59864
	153.498	-28.7653											9.37257	52.2437																			-81.3702	41.3019			4.57922	7.51087
	153.351	-28.7634											-1.7793	52.7324																			-107.539	33.1772			4.52834	7.52765
	153.451	-28.7451											23.2494	58.6039																			-69.2793	44.1876			4.55721	7.44027
	153.524	-28.6867											22.7707	58.3789																			-81.5842	41.2926			4.40937	7.58581
	153.613	-28.6442											-2.67905	53.4498																			-107.658	33.1099			4.41336	7.58686
	152.999	-28.6177											11.467	63.8016																			-86.2895	13.804			4.43737	7.43721
	153.545	-28.5869											10.0723	52.0943																			-78.8446	38.1369			4.45306	7.52662
	153.549	-28.5077											9.94193	52.1596																			-81.7318	40.9002			4.42246	7.48127
	153.549	-28.5075											22.7715	58.3735																			-122.865	38.1003			4.51434	7.42832
	153.565	-28.3817											9.9551	52.1548																			-73.064	44.2455			4.48839	7.40447
	153.571	-28.3701											23.6472	59.2024																			-81.0643	40.4172			4.49401	7.44139
	153.569	-28.3581											-2.37952	53.6309																			-79.9137	40.4736			4.46357	7.43946
	153.57	-28.3167											-0.65622	52.6531																			-81.725	41.3998			4.57434	7.52865
	153.562	-28.2722											23.6298	59.2061																			-72.5255	43.1323			4.58643	7.48079
	153.563	-28.2551											22.7593	58.3753																			-108.575	33.4083			4.40043	7.40272
	153.488	-28.2219											10.4036	52.0108																			-104.729	40.5799			4.56758	7.54883
	153.529	-28.1988											-3.06244	50.6598																			-105.273	40.0021			4.57716	7.48896
	153.386	-28.0072											-5	52																			-104.609	38.2544			4.59165	7.56022
	152.768	-27.6196											-1.62815	53.0916																			-105.27	40.015			-0.171556	5.48905
	153.335	-27.5792											14.0821	57.6771																			-105.101	40.1672			-2.32468	7.2082
	153.331	-27.5727											9.78089	52.1596																			-104.628	38.2612			32.9058	-2.40067
	153.112	-27.53											9.90674	52.1278																			-104.625	38.2465			1.3129	6.10121
	153.263	-27.515											-2.72741	54.0742																			-105.142	39.9837			32.4785	0.331603
	153.099	-27.2315											10.0544	52.1191																			-105.095	40.17			-2.23586	7.22932
	130.889	-20.1926											-2.30253	54.4895																			-104.629	38.2525			-13.1307	8.12948
	146.26	-20.0723											-2.68049	53.5397																			-104.48	38.275			-13.3912	12.4915
	146.798	-19.2415											8.09394	50.8903																			-105.089	39.9936			-4.19003	5.27414
	129.925	-14.402											18.1237	58.9851																			-104.621	38.2626			-2.22158	7.35382
	132.421	-14.3152											15.3973	57.1862																			-105.17	40.1039			-14.2068	12.3471
	135.728	-14.2886											-2.69336	52.6133																			-104.599	38.2955			-2.28011	7.33197
	132.437	-14.2536											0.68465	50.9058																			-104.685	38.2531			0.530119	7.11891
	132.219	-14.2183											0.68481	50.9085																			-104.709	40.4233			-2.30235	7.27142
	132.322	-14.2039											-2.14856	53.5303																			-105.049	40.0503			-2.34007	7.22958
	132.231	-14.2002											17.9886	59.374																			-81.4013	41.3064			-2.21322	7.3439
	132.282	-14.199											-2.07692	53.5416																			-104.638	38.2412			-2.3162	7.32293
	132.381	-14.1699											9.90055	52.4937																			-83.0355	40.233			1.28972	10.3836
	132.456	-14.1325											9.42728	52.4259																			-113.987	50.9096			1.38605	6.03819
	132.481	-14.1287											17.9941	59.1248																			-105.07	39.9464			-2.3765	7.35823
	136.525	-13.9906											13.6712	55.9248																			-92.4465	38.9464			-2.31468	7.32742
	136.45	-13.9778											5.95	49.78																			-81.6054	41.2054			29.4039	0.445301
	131.012	-13.9306											-4	51.6																			-81.6278	40.9332			1.39945	10.2841
	130.703	-13.8535											-3.4	51.6																			-108.467	39.0333			38.6098	-5.16671
	130.712	-13.8503											-2.6152	52.727																			-104.517	40.4074			38.6171	-5.19696
	131.834	-13.8213											-3.01476	54.8855																			-104.851	40.5242			25.2624	0.491706
	132.777	-13.731											9.9532	52.1572																			-105.113	40.1393			9.99157	2.84483
	132.458	-13.5167											19.5138	64.9015																			-81.6843	41.011			30.2522	-12.5961
	132.164	-13.0492											9.95172	52.1519																			-105.074	40.3978			30.2163	-12.4722
	132.631	-12.9029											6.03	50.16																			-105.042	40.3991			35.0535	-15.6812
	132.918	-12.8887											15.2566	57.4558																			-105.485	39.8371			2.03531	13.5656
	132.919	-12.8867											5.2	49.72																			-105.062	40.6242			34.6	-0.01
	131.592	-12.847											-2.22638	53.2718																			-103.817	40.2667			34.41	-0.04
	132.335	-12.7418											-4.7	52.1																			-104.729	40.5802			-16.5994	13.521
	130.989	-12.7098											-2.45572	52.627																			-82.101	39.3285			40.12	-3.22
	132.504	-12.6996											6.09	49.55																			-104.699	40.4819			10.045	2.397
	132.472	-12.6836											10.4111	60.3015																			-104.941	39.7326			-3.48857	14.254
	132.48	-12.6666											10.3643	60.2212																			-104.971	39.731			15.3481	-4.34928
	130.838	-12.444											18.3577	59.2932																			-104.754	40.0376			4.52472	7.49444
	132.959	-12.4015											10.5397	63.411																			-105.084	40.5853			30.923	3.16278
	130.845	-12.382											10.4113	60.3012																			-104.693	40.4165			30.9762	3.13625
	135.954	-11.7441											18.5581	59.2261																			-105.037	40.5449			34.68	0.07
	132.871	-11.1528											10.4088	60.3001																			-104.989	40.1602			34.1888	1.12555
	132.995	-11.0847											18.8853	59.4236																			-104.761	39.5186			30.25	-12.5
	132.995	-11.0806											10.529	63.4023																			-105.253	40.0353			-0.181561	5.62561
	132.985	-11.0586											18.3618	59.1284																			-81.6845	41.0102			-16.7224	13.4369
	123.335	-0.605825											17.9928	59.1242																			-105.046	39.8297			28.8638	-2.216
	120.175	-0.321319											18.0274	59.226																			-81.3943	41.1252			6.65833	0.34999
													18.9535	59.2857																			-104.82	39.9853			11.5333	4.16667
													-2.4484	52.6334																			-105.017	40.5084			-3.99228	8.63073
													15.4263	57.2052																			-104.711	40.5303			39.1	-5.06667
													18.1943	59.1062																			-81.5171	41.0149			8.8	3.75
													-2.7399	53.4854																			-105.111	40.1463			9.82	1.85
													-2.69972	52.7346																			-104.731	40.5825			32.5342	15.5881
													18.1769	59.1613																			-104.517	38.8333			-13.2833	8.5
													13.5407	56.8745																			-104.608	40.3203			2.11667	13.5167
													14.4314	57.9922																			-104.618	38.2307			7.1	13.4833
													15.027	57.0675																			-104.912	40.3352			32	15.5
													10.0926	59.1979																			-104.697	40.4101			36.15	9.03
													12.4629	57.2125																			-105.124	40.5539			38.18	6.45
													12.4555	57.2331																			-104.395	40.0893			10.4667	3.38333
													12.4295	57.2172																			-104.967	40.221			-1.58333	6.75
													9.95165	52.1567																			-104.854	39.7044			-1.5	6.73333
													10.4747	59.855																			-104.777	40.2819			34.58	8.25
													12.5111	57.2615																			-104.609	38.2909			-4.98553	6.52603
													12.5163	57.2212																			-105.069	40.576			-4.58333	6.26667
													9.95235	52.156																			-105.069	40.5228			29.2431	-2.7083
													-3.8	51.8																			-104.519	40.1083			12.6128	8.41681
													-2.71985	54.0788																			-104.507	38.2402			11.4268	3.84405
													-4.8	51.9																			-104.875	39.6707			34.7395	0.09665
													14.0827	57.6782																			-104.507	38.2402			11.5509	3.80406
													-0.12372	53.3471																			-104.897	40.5143			11.5977	3.85793
													-4.7	51.9																			-104.953	40.3014			39.7444	-4.13323
													-2.70946	53.4676																			-104.323	39.7383			-0.974662	9.4035
													-2.81379	51.4127																			-104.985	39.7912			-1.50267	11.8024
													9.47531	52.5292																			-107.788	37.3045			-0.336171	11.795
													18.2097	57.5739																			-105.007	39.7741			2.0833	6.3666
													12.7601	57.0558																			-108.66	39.0978			1.5166	10
													-2.67762	53.3599																			-105.032	39.7554			1.6333	9.6666
													16.1766	59.3995																			-103.804	40.2497			1.9833	7.1833
													11.7677	58.096																			-104.745	40.3446			2.1666	6.9166
													12.7801	57.0561																			-105.12	40.5407			1.7833	6.7666
													16.0343	59.451																			-105.069	39.9214			2.1833	7.6666
													16.1183	59.4035																			-104.894	39.7172			2.55	9.35
													16.1218	59.4174																			-106.845	36.0208			2.1333	6.7333
													16.0889	59.441																			-116.582	33.6156			1.1166	10.9333
													18.5468	59.3618																			-104.701	40.421			2.6166	6.4833
													11.8628	58.1516																			-96.9545	32.9407			1.05	10.6833
													10.1503	50.8889																			-81.4978	41.3028			-0.592673	10.9533
													-2.56848	51.3422																			-76.451	42.4799			-4.19906	5.21711
													16.0466	59.442																			-105.251	40.0339			1.2666	10.6166
													11.0705	63.4493																			-105.273	40.0268			11.5842	3.90445
													18.4291	59.294																			-105.136	39.5444			11.4632	3.94214
													11.8518	58.1012																			-104.616	38.2482			11.5407	3.90853
													5.99	49.45																			-104.765	39.7784			11.4616	3.8752
													16.1516	59.3699																			-105.111	40.1504			11.5196	3.85918
													18.5565	59.2292																			-105.102	39.9952			11.4601	3.89206
													16.9683	58.7603																			-104.628	39.0905			11.5987	3.47436
													11.8723	57.9767																			-105.084	40.1803			11.5909	3.92566
													11.8148	57.9856																			-104.98	39.7523			9.43185	0.547843
													11.8815	58.0216																			-104.638	38.3179			30.2807	-12.4169
													-3.1	51.8																			-104.873	39.7465			30.2627	-12.5445
													5.98	49.45																			-105.107	40.1645			30.2943	-12.5466
													15.4446	57.1967																			-104.62	38.2505			30.3067	-12.4227
													18.0148	59.0396																			-105.014	39.7576			10.0654	5.58566
													-2.68339	53.7195																			-104.619	38.2316			9.17084	3.88951
													6.02	49.47																			-105.019	39.7562			30.3356	-12.5868
													18.0323	59.2017																			-104.708	38.7241			30.2768	-12.5418
													16.9683	58.7603																			-105.107	40.1657			-0.213767	6.28909
													-2.70946	53.4676																			-105.21	40.0569			29.2219	-1.76124
													18.5121	59.3264																			-105.107	40.1646			9.40421	0.473558
													11.9749	58.086																			-105.119	40.1633			-1.6013	6.72418
													-2.45789	52.4104																			-104.73	39.1312			12.8836	10.3151
													13.054	56.7591																			-105.234	39.9943			-1.60826	6.66603
													15.4446	57.1967																			-104.945	40.1454			-1.8698	7.61135
													11.7981	58.0591																			-104.826	38.3374			0.638094	7.02123
													11.8158	58.003																			-104.969	39.727			0.689494	7.15571
													13.0047	56.7781																			-104.613	38.2496			-2.36169	7.2405
													11.784	57.8793																			-105.093	40.1669			0.633573	6.9059
													11.9636	58.1273																			-105.107	40.1648			4.45265	8.42215
													-4	53.2																			-105.093	39.9658			-0.181561	5.62561
													10.0219	52.0483																			-106.791	40.3736			30.4947	-1.8459
													57.61	58.83																			-105.252	40.0351			9.32512	0.700796
																																	-105.253	40.036			1.32083	10.3809
																																	-105.047	39.7374			29.2846	-2.0912
																																	-104.671	38.6936			20.926	0.16764
																																	-104.845	38.7888			-16.7453	13.308
																																	-104.958	39.6799			7.42058	1.63979
																																	-105.107	40.1647			7.3756	1.65
																																	-104.842	38.8361			29.3974	-2.14218
																																	-104.672	38.6931			-1.52205	12.3425
																																	-105.216	40.0323			1.83361	7.90389
																																	-104.751	38.7872			1.9538	7.037
																																	-105.013	40.1944			2.40459	6.64194
																																	-105.069	39.6094			1.69667	7.52389
																																	-104.673	39.4099			-1.83842	12.2218
																																	-104.673	39.4099			2.3918	6.575
																																	-105.099	40.1652			32.5156	-25.8255
																																	-105.249	39.9781			-16.7898	13.3054
																																	-105.146	40.0948			1.6358	6.8192
																																	-104.856	39.3722			2.089	6.3561
																																	-104.821	39.9853			2.38972	6.63139
																																	-105.355	39.666			-16.7222	13.3752
																																	-105.235	39.9941			-7.6351	4.2432
																																	-105.074	39.942			1.3176	10.6433
																																	-105.027	39.7605			-16.6492	13.2372
																																	-105.153	39.9734			0.8458	10.5098
																																	-105.106	40.1639			1.9763	9.5007
																																	-105.284	40.1449			0.52277	7.15167
																																	-104.83	38.9226			-2.21278	7.26337
																																	-104.798	39.0831			36.9384	-17.9227
																																	-105.276	40.0077			-2.27176	7.23601
																																	-104.892	39.6007			-13.1917	8.56419
																																	-104.613	38.2496			32.4043	-25.9201
																																	-105.291	40.0127			29.3824	-1.68361
																																	-105.014	40.1945			1.85366	7.88375
																																	-104.785	38.9045			-1.96646	7.68697
																																	-104.971	39.731			30.2273	-12.4829
																																	-108.125	34.9878			30.2504	-12.5979
																																	-76.2502	4.18362			30.233	-12.4276
																																	-104.458	23.5339			-16.3724	16.272
																																	-104.367	23.4656			30.3184	-12.4974
																																	-119.78	42.0473			30.3551	-12.5191
																																	-112.43	39.7662			30.3437	-12.5564
																																	-80.2977	36.8741			32.4667	-25.8064
																																	-119.731	42.1783			-1.96137	7.62482
																																	-106.178	35.9565			34.721	0.09597
																																	-104.751	23.0773			7.12407	4.66457
																																	-102.017	19.4459			-5.83272	14.2604
																																	-104.544	23.1596			9.60316	1.98429
																																	-78.66	35.8471			0.551328	7.01792
																																	-121.242	48.5005			36.7394	-3.39735
																																	-116.711	32.16			8.79751	3.60444
																																	-116.776	32.044			-17.4224	14.6503
																																	-123.923	45.0757			30.1746	-1.99873
																																	-116.089	32.4905			10.2276	-0.70661
																																	-116.755	32.038			-0.176226	5.34799
																																	-119.63	47.6641			29.3233	-3.25886
																																	-104.298	23.6799			1.942	6.40541
																																	-83.7351	42.2783			-16.7321	13.2891
																																	-121.882	36.9826			-0.40956	6.2053
																																	-108.868	33.2309			29.3227	-1.66454
																																	-106.134	25.9233			33.4839	-3.64927
																																	-106.134	25.9236			29.3989	-2.09127
																																	-121.155	45.8155			1.4369	9.3405
																																	-99.3519	39.1018			15.2379	-4.30894
																																	-116.753	32.7805			9.4113	0.577051
																																	-81.7895	41.2572			9.56176	0.437909
																																	-105.98	24.2905			0.650261	6.99114
																																	-116.016	32.4872			35.3802	-9.4782
																																	-105.98	24.2909			29.2367	-1.74116
																																	-122.703	48.3192			36.9049	-17.8878
																																	-102.26	34.5251			37.1094	-2.94407
																																	-95.2439	38.9584			-1.78149	6.77504
																																	-75.1219	4.6573			15.9825	1.55304
																																	-94.6398	37.0449			8.65552	3.67829
																																	-99.3423	38.8732			36.7977	-8.15411
																																	-94.6591	37.0368			5.88623	-1.58721
																																	-99.3302	38.8733			32.5844	0.205583
																																	-83.0075	42.2368			-0.435115	6.11574
																																	-104.384	36.9463			0.63538	7.19152
																																	-101.18	38.9124			34.7565	0.140793
																																	-99.2143	38.1806			30.2185	-12.4899
																																	-119.571	37.3137			-1.8111	7.77645
																																	-98.9489	37.4994			-1.66031	6.68106
																																	-98.9123	37.3113			38.6073	-5.05039
																																	-98.924	37.3205			39.7359	-4.91535
																																	-99.124	18.5207			7.28991	1.47174
																																	-101.806	39.7784			11.9031	-4.60002
																																	-99.3185	38.8782			-1.59089	12.2797
																																	-105.689	36.6403			-13.1917	8.56419
																																	-117.651	34.0633			34.816	-19.842
																																	-78.6392	35.7778			18.5897	-33.5704
																																	-73.7623	42.6482			-5.27997	10.7347
																																	-121.19	38.742			34.9984	-19.997
																																	-104.258	23.3879			38.6557	-5.05952
																																	-117.33	34.0641			39.3419	-6.96341
																																	-123.629	40.9394			6.68559	0.03668
																																					37.6601	-6.96492
																																					27.744	-10.475
																																					27.7247	-10.5795
																																					33.3913	0.460792
																																					1.22838	6.13037
																																					1.39084	6.13584
																																					30.2649	-12.4672
																																					1.38926	6.04563
																																					1.31306	6.18317
																																					1.38799	6.10108
																																					6.71857	0.228905
																																					37.7728	-6.82091
																																					29.6231	-2.51022
																																					1.2677	10.2027
																																					38.7773	-5.01453
																																					38.6742	-5.06305
																																					38.6263	-5.0436
References
Abraczinskas L. 2016 MSU Mammalogy, Ornithology and Vertebrate Paleontology Collections. Version 8.1. Michigan State University Museum. Occurrence dataset https://doi.org/10.15468/xypr72 accessed via GBIF.org on 2017-08-16. Accessed from R via rgbif (https://github.com/ropensci/rgbif) on 2017-08-16.
Australian Museum. 2017 Australian Museum provider for OZCAM. Occurrence dataset https://doi.org/10.15468/e7susi accessed via GBIF.org on 2017-08-16. Accessed from R via rgbif (https://github.com/ropensci/rgbif) on 2017-08-16.
Bat Conservation Trust. 2017 Natural England bat roost visit records from 2013 onwards. Occurrence dataset https://doi.org/10.15468/oy8u34 accessed via GBIF.org on 2017-08-16. Accessed from R via rgbif (https://github.com/ropensci/rgbif) on 2017-08-16.
Bat Conservation Trust. 2017 Roost Count. Occurrence dataset https://doi.org/10.15468/vm4psx accessed via GBIF.org on 2017-08-16. Accessed from R via rgbif (https://github.com/ropensci/rgbif) on 2017-08-16.
Bat Conservation Trust. 2017 Woodland Survey. Occurrence dataset https://doi.org/10.15468/0q64zu accessed via GBIF.org on 2017-08-16. Accessed from R via rgbif (https://github.com/ropensci/rgbif) on 2017-08-16.
Bradley J. 2017 UWBM Mammalogy Collection (Arctos). University of Washington Burke Museum. Occurrence dataset https://doi.org/10.15468/qziy3w accessed via GBIF.org on 2017-08-16. Accessed from R via rgbif (https://github.com/ropensci/rgbif) on 2017-08-16.
Braun J, King P. 2017 Mammals Specimens. Sam Noble Oklahoma Museum of Natural History. Occurrence dataset https://doi.org/10.15468/fmuion accessed via GBIF.org on 2017-08-16. Accessed from R via rgbif (https://github.com/ropensci/rgbif) on 2017-08-16.
Bristol Regional Environmental Records Centre. 2017 BRERC species records within last 15 years. Occurrence dataset https://doi.org/10.15468/vntgox accessed via GBIF.org on 2017-08-16. Accessed from R via rgbif (https://github.com/ropensci/rgbif) on 2017-08-16.
Christophe B, Coline C. 2016 Données ONF Faune-Flore-Fonge. Version 1.4. UMS PatriNat (AFB-CNRS-MNHN), Paris. Occurrence dataset https://doi.org/10.15468/ykstli accessed via GBIF.org on 2017-08-16. Accessed from R via rgbif (https://github.com/ropensci/rgbif) on 2017-08-16.
Citizen Science - ALA Website. 2017 ALA species sightings and OzAtlas. Occurrence dataset https://doi.org/10.15468/jayxmn accessed via GBIF.org on 2017-08-16. Accessed from R via rgbif (https://github.com/ropensci/rgbif) on 2017-08-16.
Cofnod – North Wales Environmental Information Service. 2017 Miscellaneous records held on the Cofnod database. Occurrence dataset https://doi.org/10.15468/hcgqsi accessed via GBIF.org on 2017-08-16. Accessed from R via rgbif (https://github.com/ropensci/rgbif) on 2017-08-16.
Conroy C. 2017 MVZ Mammal Collection (Arctos). Museum of Vertebrate Zoology. Occurrence dataset https://doi.org/10.15468/uwudf9 accessed via GBIF.org on 2017-08-16. Accessed from R via rgbif (https://github.com/ropensci/rgbif) on 2017-08-16.
Cook J. 2017 MSB Mammal Collection (Arctos). Museum of Southwestern Biology. Occurrence dataset https://doi.org/10.15468/oirgxw accessed via GBIF.org on 2017-08-16. Accessed from R via rgbif (https://github.com/ropensci/rgbif) on 2017-08-16.
Creuwels J, Bosch T. 2017 Vleermuiskasten.nl - Bats in bat boxes in The Netherlands and Belgium. Version 1.26. Dutch Mammal Society. Occurrence dataset https://doi.org/10.15468/m05gen accessed via GBIF.org on 2017-08-16. Accessed from R via rgbif (https://github.com/ropensci/rgbif) on 2017-08-16.
Demboski J. 2017 DMNS Mammal Collection (Arctos). Denver Museum of Nature & Science. Occurrence dataset https://doi.org/10.15468/bqvk9g accessed via GBIF.org on 2017-08-16. Accessed from R via rgbif (https://github.com/ropensci/rgbif) on 2017-08-16.
Dillman C, Dardia C. 2017 CUMV Mammal Collection. Cornell University Museum of Vertebrates. Occurrence dataset https://doi.org/10.15468/kkgkne accessed via GBIF.org on 2017-08-16. Accessed from R via rgbif (https://github.com/ropensci/rgbif) on 2017-08-16.
Dowler R, Revelez M. 2016 Angelo State Natural History Collections (ASNHC) - Mammalogy Collection. Angelo State Natural History Collections (ASNHC). Occurrence dataset https://doi.org/10.15468/wvqqpo accessed via GBIF.org on 2017-08-16. Accessed from R via rgbif (https://github.com/ropensci/rgbif) on 2017-08-16.
European Nucleotide Archive (EMBL-EBI). 2017 Geographically tagged INSDC sequences. Occurrence dataset https://doi.org/10.15468/cndomv accessed via GBIF.org on 2017-08-16. Accessed from R via rgbif (https://github.com/ropensci/rgbif) on 2017-08-16.
Feeney R. 2017 LACM Vertebrate Collection. Natural History Museum of Los Angeles County. Occurrence dataset https://doi.org/10.15468/77rmwd accessed via GBIF.org on 2017-08-16. Accessed from R via rgbif (https://github.com/ropensci/rgbif) on 2017-08-16.
Gall L. 2017 Vertebrate Zoology Division - Mammalogy, Yale Peabody Museum. Yale University Peabody Museum. Occurrence dataset https://doi.org/10.15468/4mm6uc accessed via GBIF.org on 2017-08-16. Accessed from R via rgbif (https://github.com/ropensci/rgbif) on 2017-08-16.
Garner H. 2016 TTU Mammals Collection. Version 9.1. Museum of Texas Tech University (TTU). Occurrence dataset https://doi.org/10.15468/yocqyp accessed via GBIF.org on 2017-08-16. Accessed from R via rgbif (https://github.com/ropensci/rgbif) on 2017-08-16.
González Cózatl FX, Comisión nacional para el conocimiento y uso de la biodiversidad C (2018). Computarización de la colección de mamíferos del Centro de Educación Ambiental e Investigación Sierra de Huautla (CEAMISH) de la Universidad Autónoma del Estado de Morelos (UAEM). Version 1.5. Comisión nacional para el conocimiento y uso de la biodiversidad. Occurrence dataset https://doi.org/10.15468/f…
Grant S, Ferguson A. 2017. Field Museum of Natural History (Zoology) Mammal Collection. Field Museum. Occurrence dataset https://doi.org/10.15468/n4zgxw accessed via GBIF.org on 2017-08-16. Accessed from R via rgbif (https://github.com/ropensci/rgbif) on 2017-08-16.
Harvard University M, Morris P J. 2017 Museum of Comparative Zoology, Harvard University. Museum of Comparative Zoology, Harvard University. Occurrence dataset https://doi.org/10.15468/p5rupv accessed via GBIF.org on 2017-08-16. Accessed from R via rgbif (https://github.com/ropensci/rgbif) on 2017-08-16.
iNaturalist.org. 2017 iNaturalist Research-grade Observations. Occurrence dataset https://doi.org/10.15468/ab3s5x accessed via GBIF.org on 2017-08-16. Accessed from R via rgbif (https://github.com/ropensci/rgbif) on 2017-08-16.
Institute of Biodiversity, Animal Health and Comparative Medicine College of Medical, Veterinary and Life Sciences, University of Glasgow. 2016 International Barcode of Life project (iBOL). Occurrence dataset https://doi.org/10.15468/inygc6 accessed via GBIF.org on 2017-08-16. Accessed from R via rgbif (https://github.com/ropensci/rgbif) on 2017-08-16.
Lancashire Environment Record Network. 2017 LERN Records. Occurrence dataset https://doi.org/10.15468/ accessed via GBIF.org on 2017-08-16. Accessed from R via rgbif (https://github.com/ropensci/rgbif) on 2017-08-16.
León Paniagua L, Comisión nacional para el conocimiento y uso de la biodiversidad C. 2017 Actualización de la base de datos de la Colección de mamíferos del Museo de Zoología 'Alfonso L. Herrera'. Version 1.5. Comisión nacional para el conocimiento y uso de la biodiversidad. Occurrence dataset https://doi.org/10.15468/hwtlzh accessed via GBIF.org on 2017-08-16. Accessed from R via rgbif (https://…
López González C, Comisión nacional para el conocimiento y uso de la biodiversidad C. 2017 Mamíferos silvestres de la cuenca del río Mezquital-San Pedro, Durango-Nayarit. Version 1.6. Comisión nacional para el conocimiento y uso de la biodiversidad. Occurrence dataset https://doi.org/10.15468/6xlqcs accessed via GBIF.org on 2017-08-16. Accessed from R via rgbif (https://github.com/ropensci/rgbif)…
Leicestershire and Rutland Environmental Records Centre. 2017 Leicestershire and Rutland Protected and Conservation Priority/BAP Specie. Occurrence dataset https://doi.org/10.15468/7ve2nt accessed via GBIF.org on 2017-08-16. Accessed from R via rgbif (https://github.com/ropensci/rgbif) on 2017-08-16.
Mancina CA, García-Rivera L, Miller BW. 2012 Wing morphology, echolocation, and resource partitioning in syntopic Cuban mormoopid bats. Journal of Mammalogy 93,1308–1317.
Merseyside BioBank. 2017 Merseyside BioBank (verified). Occurrence dataset https://doi.org/10.15468/ar0p6s accessed via GBIF.org on 2017-08-16. Accessed from R via rgbif (https://github.com/ropensci/rgbif) on 2017-08-16.
Millen B, Lim B. 2017 Mammalogy Collection - Royal Ontario Museum. Royal Ontario Museum. Occurrence dataset https://doi.org/10.15468/2rlrvh accessed via GBIF.org on 2017-08-16. Accessed from R via rgbif (https://github.com/ropensci/rgbif) on 2017-08-16.
Muséum d'histoire naturelle de la Ville de Genève - MHNG. Mammals housed at MHNG, Geneva. Occurrence dataset https://doi.org/10.15468/lwu4fj accessed via GBIF.org on 2017-08-16. Accessed from R via rgbif (https://github.com/ropensci/rgbif) on 2017-08-16.
Museum für Naturkunde Berlin. Animal Sound Archive. Occurrence dataset https://doi.org/10.15468/ accessed via GBIF.org on 2017-08-16. Accessed from R via rgbif (https://github.com/ropensci/rgbif) on 2017-08-16.
National Chemical Laboratory. IndOBIS, Indian Ocean Node of OBIS. Occurrence dataset https://doi.org/10.15468/tbedgi accessed via GBIF.org on 2017-08-16. Accessed from R via rgbif (https://github.com/ropensci/rgbif) on 2017-08-16.
Natural History Museum. 2017 Natural History Museum (London) Collection Specimens. Occurrence dataset https://doi.org/10.5519/0002965 accessed via GBIF.org on 2017-08-16. Accessed from R via rgbif (https://github.com/ropensci/rgbif) on 2017-08-16.
naturgucker.de. naturgucker. Occurrence dataset https://doi.org/10.15468/uc1apo accessed via GBIF.org on 2017-08-16. Accessed from R via rgbif (https://github.com/ropensci/rgbif) on 2017-08-16.
Nelson A, Johnson N. 2017 Ohio State University Tetrapod Division - Mammal Collection (OSUM). Museum of Biological Diversity, The Ohio State University. Occurrence dataset https://doi.org/10.15468/jyhwea accessed via GBIF.org on 2017-08-16. Accessed from R via rgbif (https://github.com/ropensci/rgbif) on 2017-08-16.
Northern Territory Department of Land Resource Management. 2017 Fauna Atlas NT. Occurrence dataset https://doi.org/10.15468/eeg0zb accessed via GBIF.org on 2017-08-16. Accessed from R via rgbif (https://github.com/ropensci/rgbif) on 2017-08-16.
Nyegaard T. 2017 DOF - Observations from the Danish Ornithological Society. Danish Ornithological Society. Occurrence dataset https://doi.org/10.15468/tww7cj accessed via GBIF.org on 2017-08-16. Accessed from R via rgbif (https://github.com/ropensci/rgbif) on 2017-08-16.
Office of Environment & Heritage. 2017 OEH Atlas of NSW Wildlife. Occurrence dataset https://doi.org/10.15468/14jd9g accessed via GBIF.org on 2017-08-16. Accessed from R via rgbif (https://github.com/ropensci/rgbif) on 2017-08-16.
Orrell T. 2017 NMNH Extant Specimen Records. National Museum of Natural History, Smithsonian Institution. Occurrence dataset https://doi.org/10.15468/hnhrg3 accessed via GBIF.org on 2017-08-16. Accessed from R via rgbif (https://github.com/ropensci/rgbif) on 2017-08-16.
Pérez Torres J, Pantoja Peña GE, Cruz-Rodríguez CA, Chala, Quintero SM. 2017 Colección de mamíferos del Museo de Historia Natural de la Pontificia Universidad Javeriana. Version 4.6. Pontificia Universidad Javeriana. Occurrence dataset https://doi.org/10.15472/r6zvqk accessed via GBIF.org on 2017-08-16. Accessed from R via rgbif (https://github.com/ropensci/rgbif) on 2017-08-16.
Pollichia – Verein für Naturforschung und Landespflege e.V. ArtenFinder. Occurrence dataset https://doi.org/10.15468/jnnald accessed via GBIF.org on 2017-08-16. Accessed from R via rgbif (https://github.com/ropensci/rgbif) on 2017-08-16.
Questagame. 2017 Questagame weekly feed. Occurrence dataset https://doi.org/10.15468/slqqt8 accessed via GBIF.org on 2017-08-16. Accessed from R via rgbif (https://github.com/ropensci/rgbif) on 2017-08-16.
Record. 2017 RECORD Chiroptera Data. Occurrence dataset https://doi.org/10.15468/36o8sp accessed via GBIF.org on 2017-08-16. Accessed from R via rgbif (https://github.com/ropensci/rgbif) on 2017-08-16.
Roasto R. 2017 Estonian Nature Observations Database. Estonian Environment Information Centre. Occurrence dataset https://doi.org/10.15468/dlblir accessed via GBIF.org on 2017-08-16. Accessed from R via rgbif (https://github.com/ropensci/rgbif) on 2017-08-16.
Saelao T, Soisook P. 2017 PSUZC-Mammal Collection. Princess Maha Chakri Sirindhorn Natural History Museum (PSU Museum, Prince of Songkla University, Thailand). Occurrence dataset https://doi.org/10.15468/xfkmp6 accessed via GBIF.org on 2017-08-16. Accessed from R via rgbif (https://github.com/ropensci/rgbif) on 2017-08-16.
Shah M, Coulson S. 2017 Artportalen (Swedish Species Observation System). ArtDatabanken. Occurrence dataset https://doi.org/10.15468/kllkyl accessed via GBIF.org on 2017-08-16. Accessed from R via rgbif (https://github.com/ropensci/rgbif) on 2017-08-16.
Shugart G. 2016 PSM Vertebrates Collection. Version 8.1. James R. Slater Museum of Natural History. Occurrence dataset https://doi.org/10.15468/3oaz5o accessed via GBIF.org on 2017-08-16. Accessed from R via rgbif (https://github.com/ropensci/rgbif) on 2017-08-16.
Shropshire Ecological Data Network. 2017 Shropshire Ecological Data Network database. Occurrence dataset https://doi.org/10.15468/5v5pvk accessed via GBIF.org on 2017-08-16. Accessed from R via rgbif (https://github.com/ropensci/rgbif) on 2017-08-16.
Slade N. 2017 KUBI Mammalogy Collection. University of Kansas Biodiversity Institute. Occurrence dataset https://doi.org/10.15468/a3woj7 accessed via GBIF.org on 2017-08-16. Accessed from R via rgbif (https://github.com/ropensci/rgbif) on 2017-08-16.
South East Wales Biodiversity Records Centre. 2017 SEWBReC Mammals (South East Wales). Occurrence dataset https://doi.org/10.15468/atlxpp accessed via GBIF.org on 2017-08-16. Accessed from R via rgbif (https://github.com/ropensci/rgbif) on 2017-08-16.
Staffordshire Ecological Record. 2017 SER Species-based Surveys. Occurrence dataset https://doi.org/10.15468/q8qen3 accessed via GBIF.org on 2017-08-16. Accessed from R via rgbif (https://github.com/ropensci/rgbif) on 2017-08-16.
Telfer A, deWaard J. 2016 Inventory and BioBlitz Records from rare Charitable Research Reserve. Version 8.2. University of Guelph. Occurrence dataset https://doi.org/10.5886/hh6td9jn accessed via GBIF.org on 2017-08-16. Accessed from R via rgbif (https://github.com/ropensci/rgbif) on 2017-08-16.
The Mammal Society. 2017 National Mammal Atlas Project, online recording. Occurrence dataset https://doi.org/10.15468/i2eosa accessed via GBIF.org on 2017-08-16. Accessed from R via rgbif (https://github.com/ropensci/rgbif) on 2017-08-16.
The Norwegian Biodiversity Information Centre, Hoem S. 2017 Norwegian Species Observation Service. The Norwegian Biodiversity Information Centre (NBIC). Occurrence dataset https://doi.org/10.15468/zjbzel accessed via GBIF.org on 2017-08-16. Accessed from R via rgbif (https://github.com/ropensci/rgbif) on 2017-08-16.
Trombone T. 2016 AMNH Mammal Collections. American Museum of Natural History. Occurrence dataset https://doi.org/10.15468/wu3poe accessed via GBIF.org on 2017-08-16. Accessed from R via rgbif (https://github.com/ropensci/rgbif) on 2017-08-16.
Turpel A, Walisch T. 2017 Collections and observation data National Museum of Natural History Luxembourg. Musée national d'histoire naturelle Luxembourg. Occurrence dataset https://doi.org/10.15468/s2iu7d accessed via GBIF.org on 2017-08-16. Accessed from R via rgbif (https://github.com/ropensci/rgbif) on 2017-08-16.
University of Michigan Museum of Zoology. 2017 University of Michigan Museum of Zoology, Division of Mammals. Occurrence dataset https://doi.org/10.15468/dx3rcj accessed via GBIF.org on 2017-08-16. Accessed from R via rgbif (https://github.com/ropensci/rgbif) on 2017-08-16.
Vanreusel W, Swinnen K, Gielen K, Vercayie D, Driessens G, Veraghtert W, Desmet P, Herremans M. 2019 Waarnemingen.be - Non-native animal occurrences in Flanders and the Brussels Capital Region, Belgium. Natuurpunt. Occurrence dataset https://doi.org/10.15468/k2aiak accessed via GBIF.org on 2017-08-16. Accessed from R via rgbif (https://github.com/ropensci/rgbif) on 2017-08-16.
Vela Vargas IM. 2017 Caracterización biológica de la ventana de biodiversidad Montes de María, Municipio de Colosó, Sucre, Colombia. Version 1.1. Instituto de Investigación de Recursos Biológicos Alexander von Humboldt. Occurrence dataset https://doi.org/10.15472/34d3kc accessed via GBIF.org on 2017-08-16. Accessed from R via rgbif (https://github.com/ropensci/rgbif) on 2017-08-16.
Vela Vargas IM. 2017 Tejidos colectados en la ventana de biodiversidad Montes de María, Municipio de Colosó, Sucre, Colombia. Version 1.1. Instituto de Investigación de Recursos Biológicos Alexander von Humboldt. Occurrence dataset https://doi.org/10.15472/ikthxf accessed via GBIF.org on 2017-08-16. Accessed from R via rgbif (https://github.com/ropensci/rgbif) on 2017-08-16.
West Wales Biodiversity Information Centre. 2017 Mammal Records (West Wales). Occurrence dataset https://doi.org/10.15468/vitiic accessed via GBIF.org on 2017-08-16. Accessed from R via rgbif (https://github.com/ropensci/rgbif) on 2017-08-16.
You Y, Sun K, Xu L, Wang L, Jiang T, Liu S, Lu G, Berquist SW, Feng J. 2010 Pleistocene glacial cycle effects on the phylogeography of the Chinese endemic bat species, Myotis davidii. BMC Evolutionary Biology 10,208.
